# Supplementary material for: Elucidating the cellular uptake mechanism of aptamer-functionalized graphene-isolated-Au-nanocrystals with dual-modal imaging
Source: Royal Society of Chemistry journal article supplement (doi:10.1039/c6an00483k), 2016-01-01
Supplement: c6an00483k1.pdf [file c6an00483k1.pdf]

## Electronic Supplementary Information (ESI)

### Elucidating the cellular uptake mechanism of aptamer-functionalized graphene-isolated-Au-nanocrystals with dual-modal imaging

Shanshan Wang<sup>a</sup>, Zhangkun Liu<sup>a</sup>, Yuxiu Zou<sup>a</sup>, Xiaofang Lai<sup>a</sup>, Ding Ding<sup>a</sup>, Long Chen<sup>c</sup>, Liqin Zhang<sup>a</sup>, Yuan Wu<sup>a</sup>, Zhuo Chen<sup>a\*</sup> & Weihong Tan<sup>a,b\*</sup>

Molecular Science and Biomedicine Laboratory, State Key Laboratory of Chemo/Bio-Sensing and Chemometrics, College of Chemistry and Chemical Engineering, College of Biology, Hunan University, Changsha, 410082, China

Center for Research at Bio/Nano Interface, Department of Chemistry and Department of Physiology and Functional Genomics, Shands Cancer Center, UF Genetics Institute and McKnight Brain Institute, University of Florida, Gainesville, Florida 32611-7200, United States

Faculty of Sciences and Technology, University of Macau, Av. Padre Tomas Pereira Taipa, Macau, China

\*To whom correspondence should be addressed:

Phone:

Fax:

E-mail: [zhuochen@hnu.edu.cn](mailto:zhuochen@hnu.edu.cn); [tan@chem.ufl.edu](mailto:tan@chem.ufl.edu)

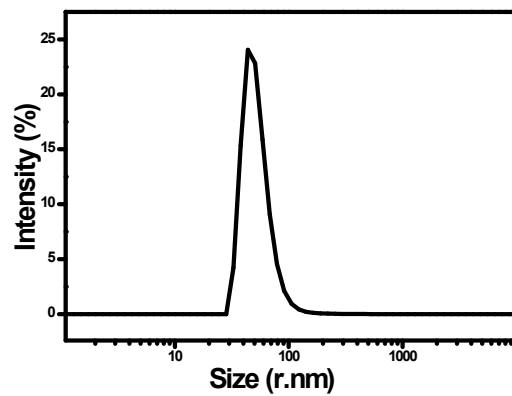

**Figure S1.** DLS characterization of the size distribution of the suspended GIANS.

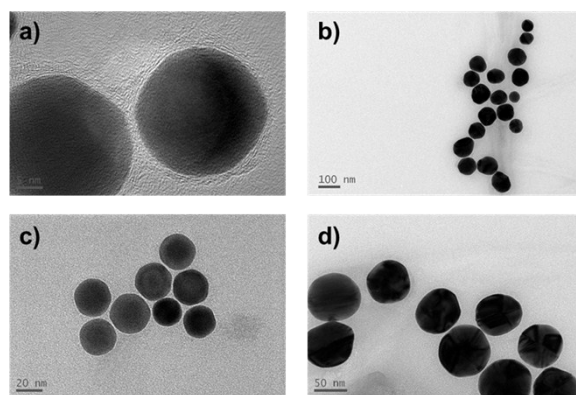

**Figure S2.** Transmission electron microscopy characterization of GIANS.

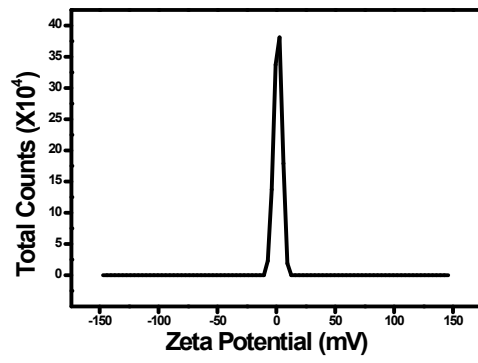

**Figure S3.**  $\zeta$ -potential curves of the GIAN suspension measured at room temperature on the ZetaSizer Nano ZS90.

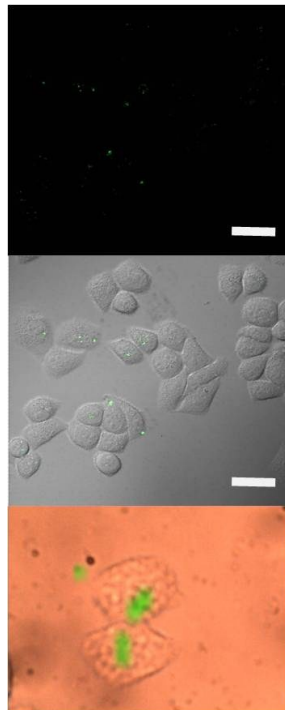

**Figure S4.** Cells were pretreated with cytochalasin D before incubation with GIANs.
